# Supplementary material for: Inflammatory Markers and Clinical Factors as Key Independent Risk Factors for Frailty: A Retrospective Study
Source: Research Square preprint supplement (doi:10.21203/rs.3.rs-6244532/v1), 2025-04-23
Supplement: Supplementary file 1 [file b80e893053b2bca24a1dde45.docx]

Supplementary Table1. Population characteristics of patients

| Population characteristics | (n=800) | | | |
| --- | --- | --- | --- | --- |
| **Basic characteristics** | | |  |
| Age (years) | | | 77.6±10.2 | |
| Male (n, %) | | | 577 (72.1%) |
| BMI (kg/m2) | | | 24.5±3.5 |
| Hypertension (n, %) | | | 576 (72.0%) |
| Diabetes (n, %) | | | 267 (33.3%) |
| CAD (n, %) | | | 284 (35.5%) |
| OCI (n, %) | | | 103 (12.9%) |
| Hyperlipidemia (n, %) | | | 418 (52.2%) |
| Hyperuricemia (n, %) | | | 90 (11.3%) |
| AF (n, %) | | | 87 (10.9%) |
| History of smoking | | | 291 (36.4%) |
| **Medication usage** | | |  |
| ACEI/ARB (n, %) | | | 300 (37.5%) |
| β-Blocker (n, %) | | | 190 (23.8%) |
| CCBs (n, %) | | | 314 (39.3%) |
| Statins (n, %) | | | 338 (42.3%) |
| Antiplatelet Drugs | | 217 (27.1%) | |
| **Laboratory test** | | |  |
| WBC (109/L) | | | 6.3±2.0 |
| Neutrophil (109/L) | | 3.7 (2.9,4.6) | |
| Lymphocyte (109/L) | | | 1.7 (1.3,2.1) |
| NLR (Neutrophil/ Lymphocyte) | | | 2.1 (1.6,3.0) |
| h-CRP (mg/L) | | | 1.0 (0.5,2.6) |
| D-Dimer (μg/L) | | | 0.6 (0.4, 1.0) |
| fibrinogen (g/L) | | | 3.3±0.8 |
| Alb (g/L) | | | 37.6 (35.3,40.3) |
| FAR (fibrinogen / albumin) | | | 0.08 (0.07,0.1) |
| ESR (mm/h) | | | 11.0 (7.0, 17.0) |
| **Fried frailty phenotype** | | |  |
| Non-frail | | | 266 (33.3%) |
| Pre-frail | | | 329 (41.1%) |
| Frail | | | 1. 5.6%) |
